# Supplementary material for: Three-dimensional honeycomb-like porous carbon derived from corncob for the removal of heavy metals from water by capacitive deionization
Source: Royal Society of Chemistry journal article supplement (doi:10.1039/c7ra10689k), 2018-01-01
Supplement: c7ra10689k1.pdf [file c7ra10689k1.pdf]

## Supporting Information

### **Three-dimensional honeycomb-like porous carbon derived from corn cob for removal of heavy metal from water by capacitive deionization**

X. F. Zhang,<sup>a,b\*</sup> B. Wang,<sup>c</sup> J. Yu,<sup>b\*</sup> X. N. Wu,<sup>a</sup> Y. H. Zang,<sup>a</sup> H. C. Gao,<sup>a</sup> P. C. Su<sup>a</sup> and S. Q. Hao<sup>a</sup>

<sup>a</sup> Department of Chemical Engineering, Chengde Petroleum College, Xueyuan Road, Chengde, China. E-mail: zxfzcg168@163.com

<sup>b</sup> College of Material Science and Chemical Engineering, Harbin Engineering University, Harbin, China. E-mail: yujing006@yeah.net

<sup>c</sup> School of Chemistry, University of Manchester, Oxford Road, Manchester M13 9PL, United Kingdom

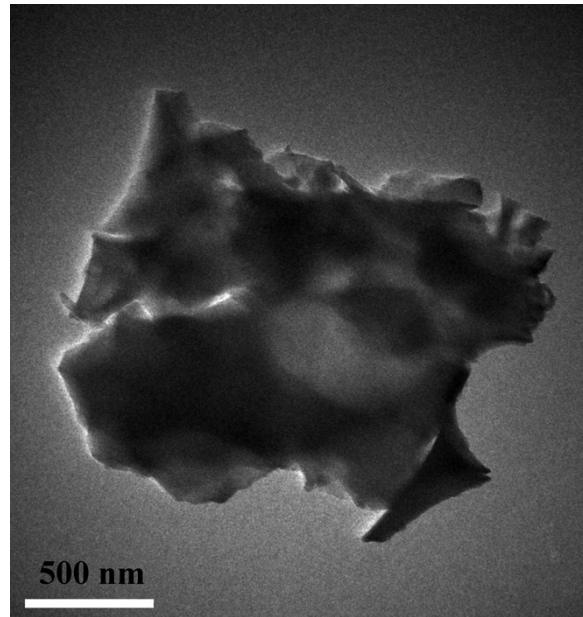

Figure S1. TEM image of 3DHPC.

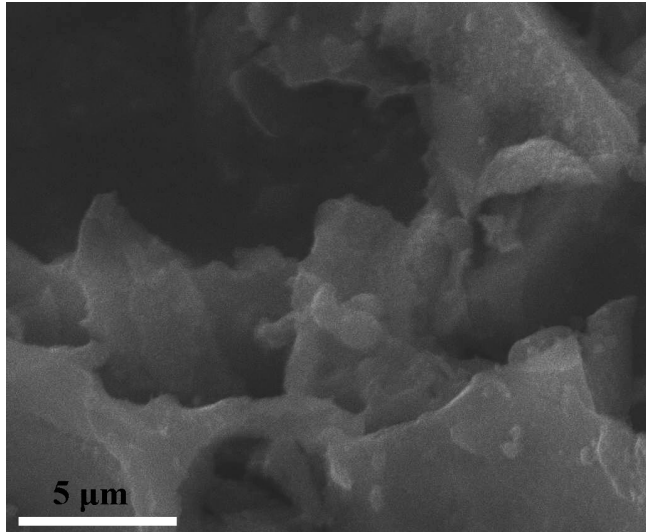

Figure S2. SEM image of DHC.
